# Supplementary material for: Ab initio studies on graphyne (GY) for the detection of rare bases in DNA
Source: Royal Society of Chemistry journal article supplement (doi:10.1039/d2cp04648b), 2023-01-01
Supplement: d2cp04648b1.pdf [file d2cp04648b1.pdf]

## Supporting information

-for-

An Ab-initio Study of the Graphyne (GY) for Detection of Rare Bases in DNA

Mengdan Lv Ruirui Li Xia Zeng Lingxia Jin\* Caibin Zhao

Yanhong Gao Min Jiang Gongwei Qin Chen Li Shengrui Zhang\*

Shaanxi Key Laboratory of Catalysis, School of Chemical & Environment Science, Shaanxi University of Technology, Hanzhong 723001

### Table and Figure from calculation

#### Contents:

Figure S1: Optimized geometries and interplanar distances of the complexes of rare bases (a:Cyt, b:5-meCyt, c:5-hmCyt, d:5-fCyt, e:5-caCyt) with B-doped  $\gamma$ -GY, The top views as well as the side views of the complexes are shown. (gray ball is C atom; white ball is H atom; red ball is O atom; blue ball is N atom; pink ball is B atom.)

Figure S2: Optimized geometries and interplanar distances of the complexes of rare bases (a:Cyt, b:5-meCyt, c:5-hmCyt, d:5-fCyt, e:5-caCyt) with N-doped  $\gamma$ -GY, The top views as well as the side views of the complexes are shown. (gray ball is C atom; white ball is H atom; red ball is O atom; blue ball is N atom.)

Figure S3: Energy band structure and DOS spectrum of the complexes of rare bases (a:Cyt, b:5-meCyt, c:5-hmCyt, d:5-fCyt, e:5-caCyt) with B-doped  $\gamma$ -GY.

Figure S4: Energy band structure and DOS spectrum of the complexes of rare bases (a:Cyt, b:5-meCyt, c:5-hmCyt, d:5-fCyt, e:5-caCyt) with N-doped  $\gamma$ -GY.

Table S1: The cohesive energies of graphene and B/N-doped grapheme, pristine, B- and N-doped  $\gamma$ -GY.

Table S2: The adsorption energy ( $E_{ad}/eV$ ) upon adsorption of rare base on different nanostructures.

---

\* Corresponding authors. Tel: +86-916-2641660; e-mail: [jinlx@snut.edu.cn](mailto:jinlx@snut.edu.cn) (L.X. Jin); e-mail: [zhangshr09@sina.com](mailto:zhangshr09@sina.com) (S. R. Zhang).

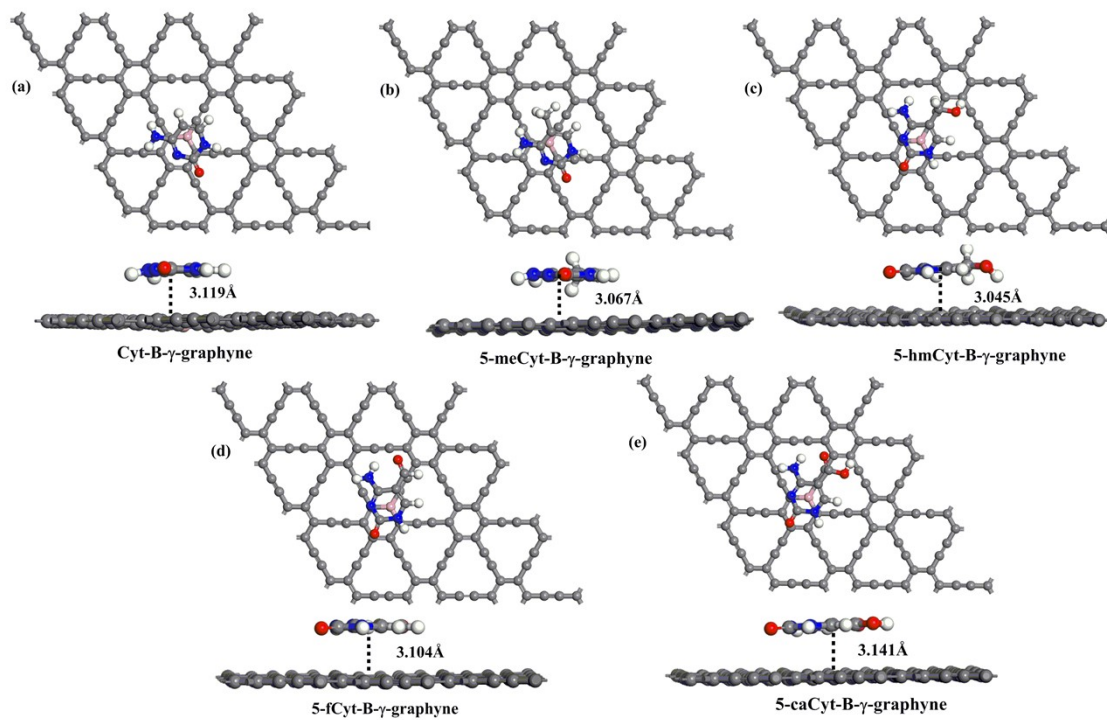

Fig. S1

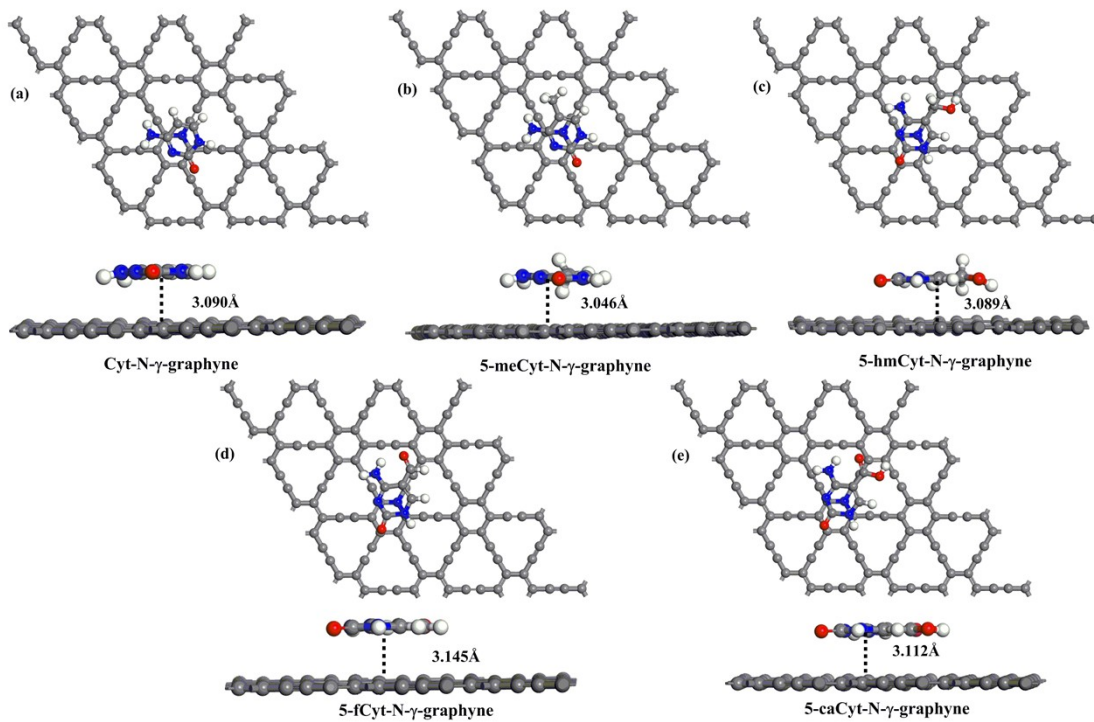

Fig. S2

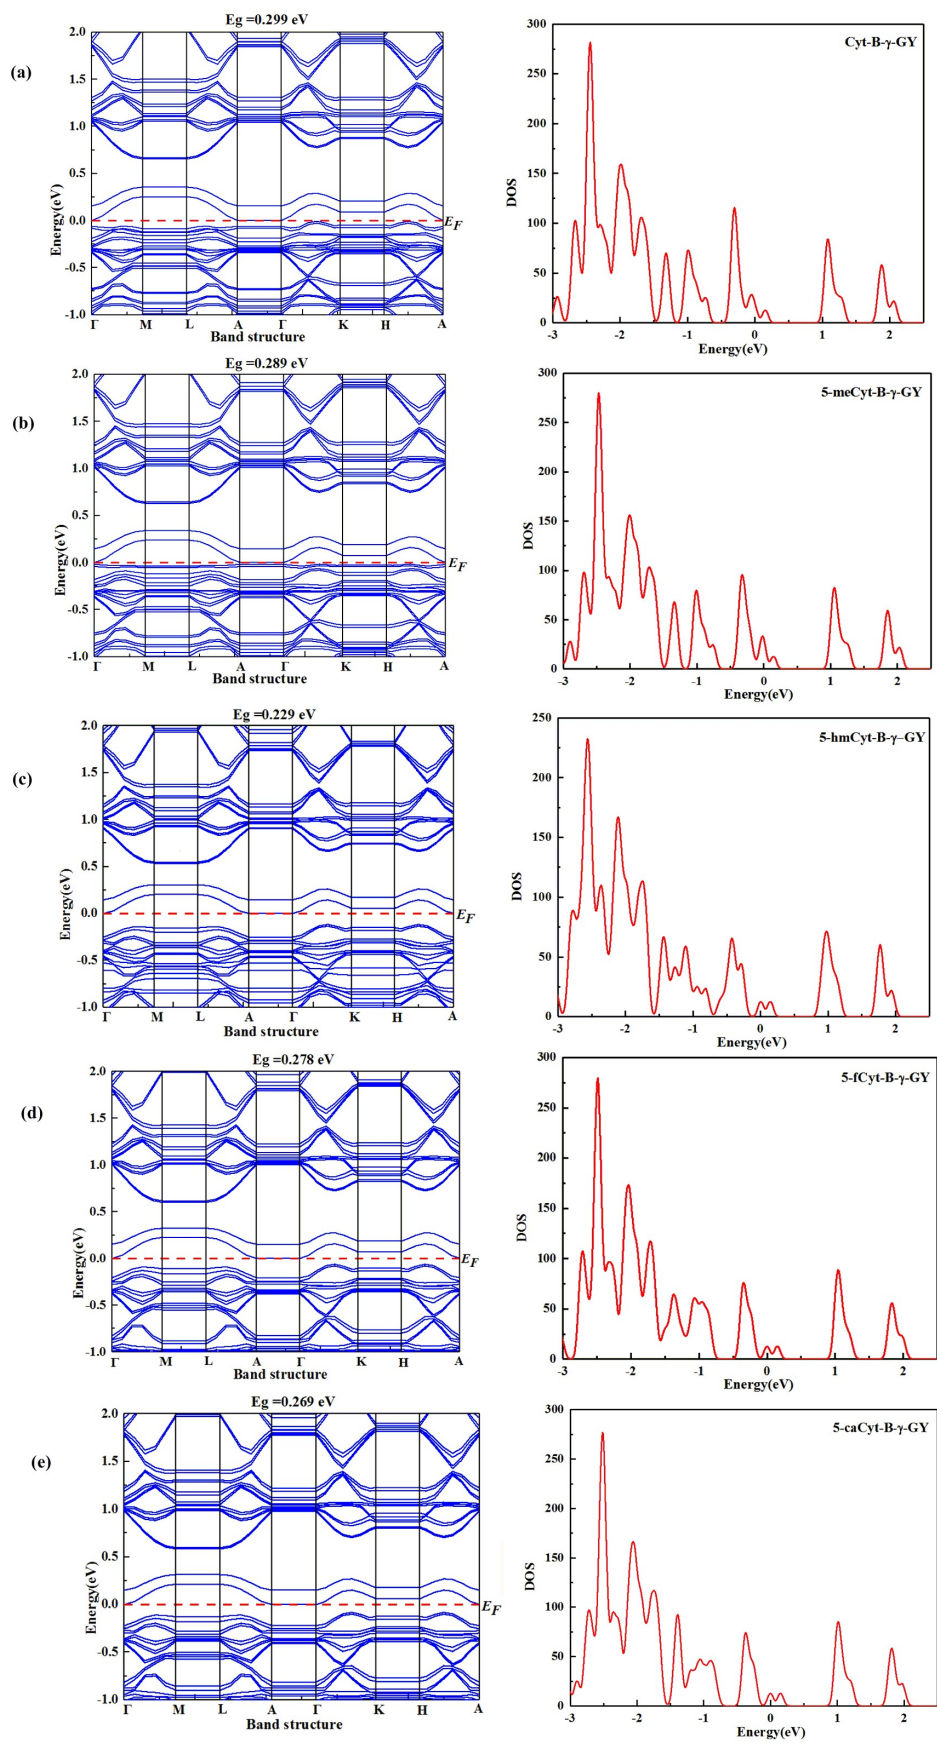

Fig. S3

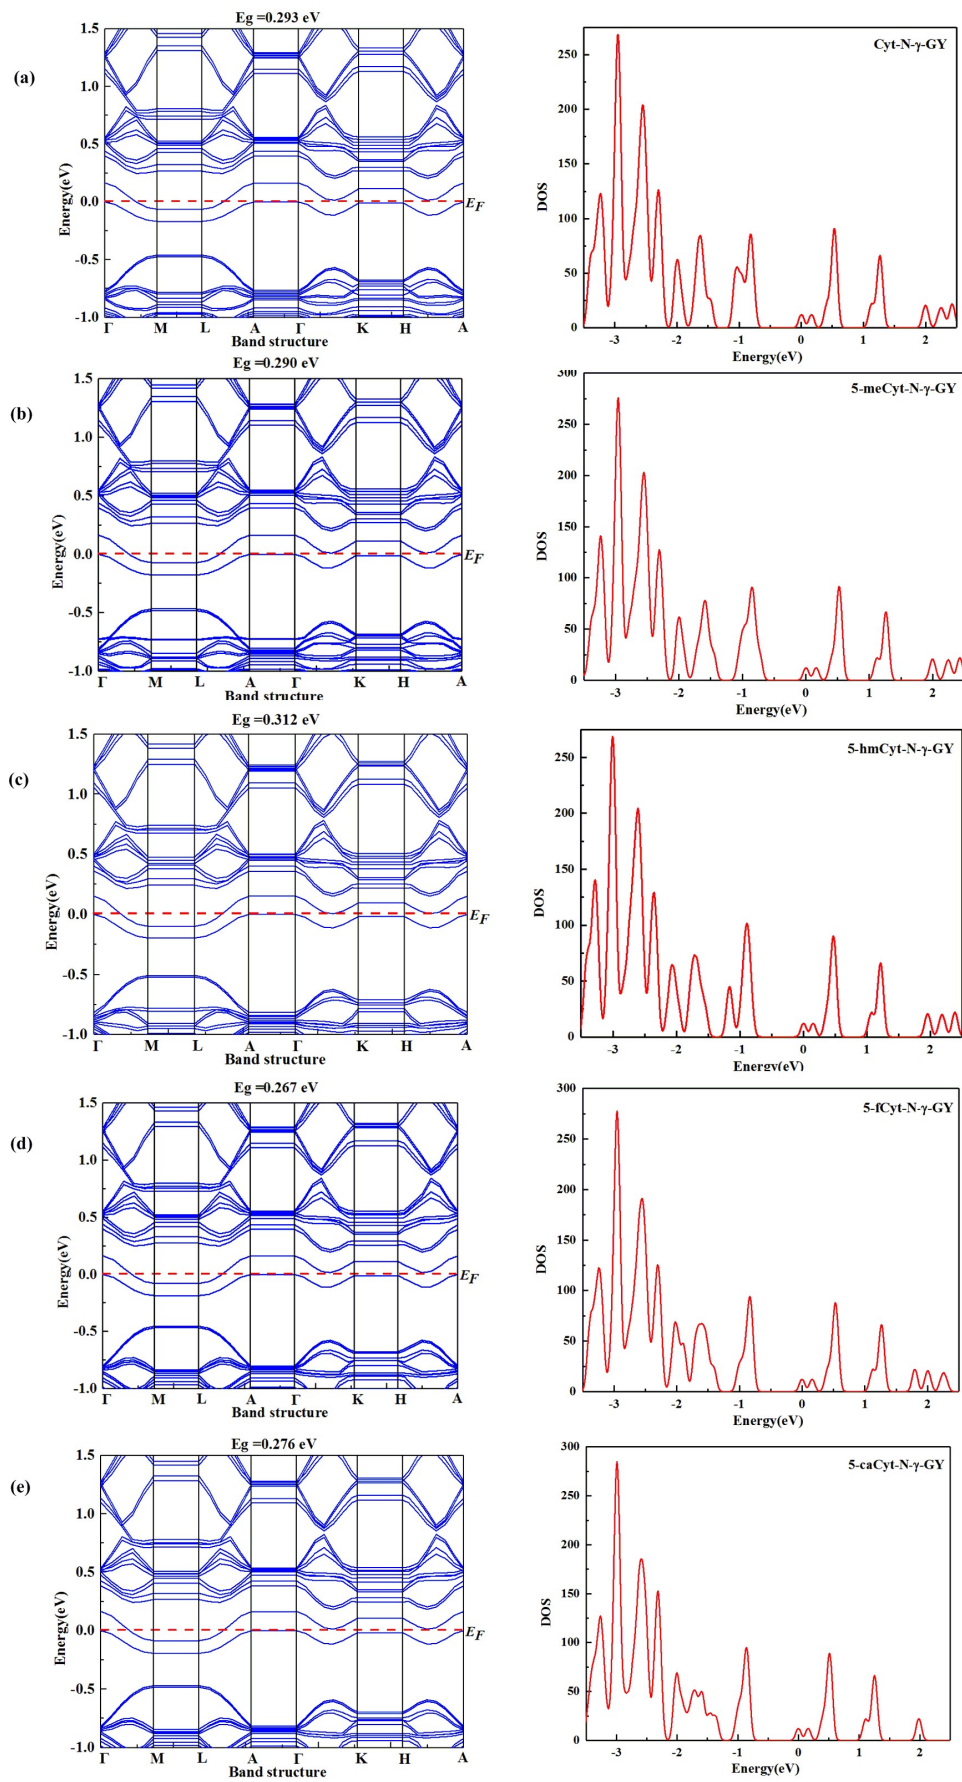

Fig. S4

Table S1: The cohesive energies (eV) of graphene and B/N-doped graphene, pristine, B- and N-doped  $\gamma$ -GY

| Nanostructure   | $E_{\text{coh}}/ \text{eV}$ |
|-----------------|-----------------------------|
| $\gamma$ -GY    | -8.79                       |
| B- $\gamma$ -GY | -8.78                       |
| N- $\gamma$ -GY | -8.74                       |
| graphene        | -9.35                       |
| B-graphene      | -9.28                       |

Table S2 The adsorption energy ( $E_{\text{ad}}/\text{eV}$ ) upon adsorption of rare base on different nanostructures

| Rare base and Nanostructure | $\gamma$ -GY | B- $\gamma$ -GY | N- $\gamma$ -GY | graphene | B-graphene | N-graphene |
|-----------------------------|--------------|-----------------|-----------------|----------|------------|------------|
| Cyt                         | -0.781       | -0.986          | -0.853          | -1.156   | -1.340     | -1.298     |
| 5-meCyt                     | -0.814       | -1.033          | -0.905          | -1.462   | -1.633     | -1.588     |
| 5-hmCyt                     | -0.957       | -1.122          | -0.933          | -1.188   | -1.470     | -1.399     |
| 5-fCyt                      | -0.689       | -0.903          | -0.697          | -1.553   | -1.666     | -1.551     |
| 5-caCyt                     | -0.791       | -0.979          | -0.778          | -1.166   | -1.322     | -1.177     |
